# Supplementary material
Source: PubMed Central journal article supplement (PMC3154588)
Supplement: supp_00001.2011_legend.pdf [file supp_00001.2011_legend.pdf]

**Supplementary Figure 1. No significant alteration of subcellular distribution of V-ATPase in simvastatin treated animal kidneys.** Immunofluorescence staining of kidneys from simvastatin treated animals does not reveal any significant alteration of the subcellular distribution of V-ATPase A or B subunit in the intercalated cells, while significant membrane accumulation of AQP2 is seen in the principal cells in the same CD. Scale bar = 10  $\mu\text{m}$ .
