# Supplementary material
Source: PubMed Central journal article supplement (PMC3154588)

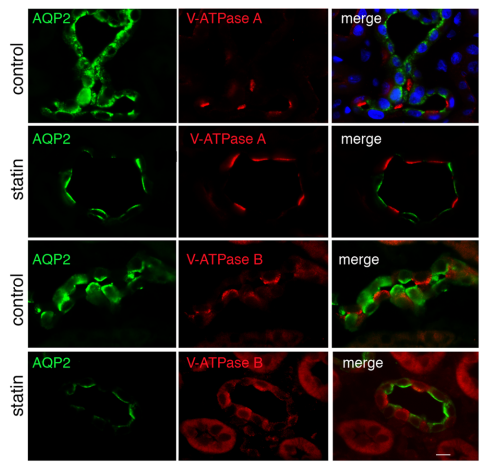

Supplement: supp_00001.2011_suppdata.pdf [file supp_00001.2011_suppdata.pdf]
